# Supplementary material
Source: ML conference proceedings conference paper supplement (https://openreview.net/forum?id=WxnrX42rnS)
Supplement: supplementary_material [file attachment]

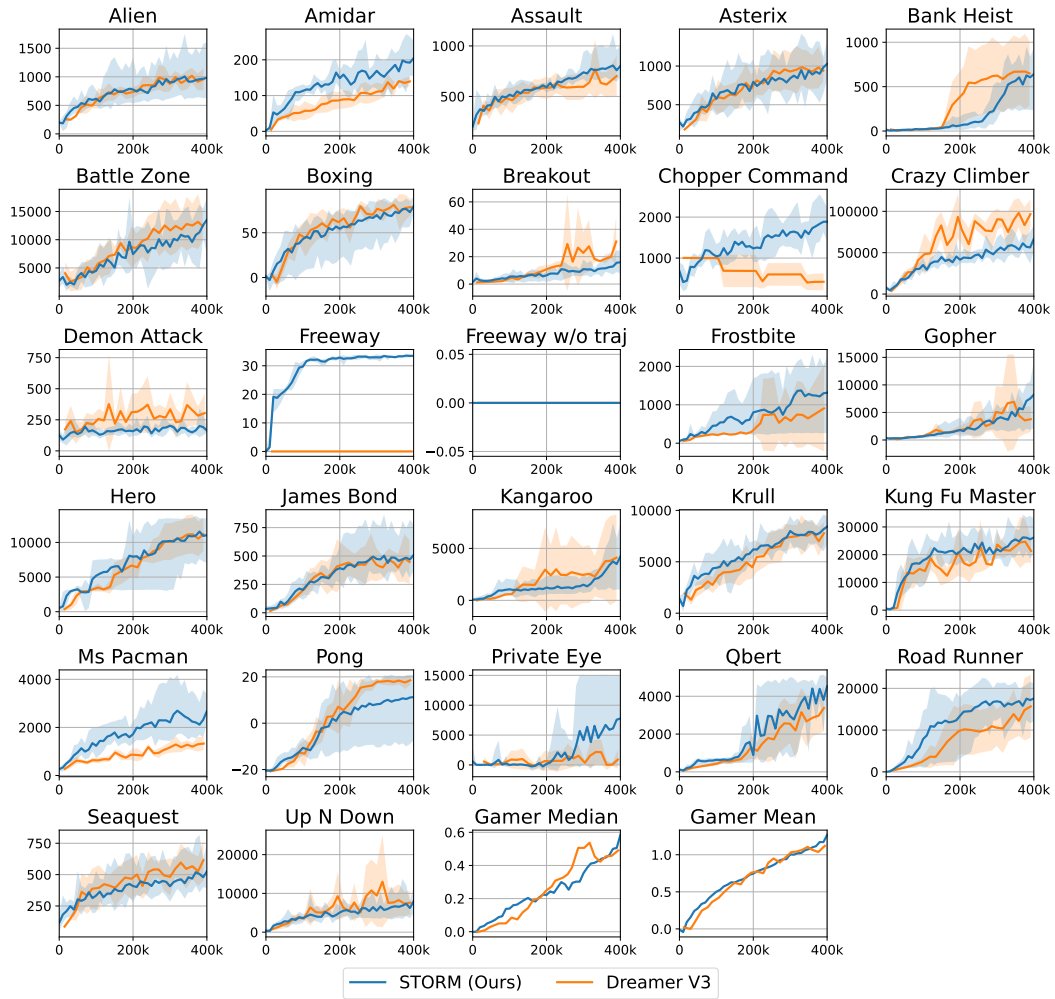

Figure 6: Performance comparison on the Atari 100k benchmark. Our method is represented in blue, while DreamerV3 [8] is in orange. The solid line represents the average result over 5 seeds, and the filled area indicates the range between the maximum and minimum results across these 5 seeds.

Table 2: Structure of the image encoder. The size of the submodules is omitted and can be derived from the shape of the tensors. ReLU refers to the rectified linear units used for activation, while Linear represents a fully-connected layer. Flatten and Reshape operations are employed to alter the indexing method of the tensor while preserving the data and their original order. Conv denotes a CNN layer [28], characterized by kernel = 4, stride = 2, and padding = 1. BN denotes the batch normalization layer[35].

| Submodule                          | Output tensor shape      |
|------------------------------------|--------------------------|
| Input image ( $o_t$ )              | $3 \times 64 \times 64$  |
| Conv1 + BN1 + ReLU                 | $32 \times 32 \times 32$ |
| Conv2 + BN2 + ReLU                 | $64 \times 16 \times 16$ |
| Conv3 + BN3 + ReLU                 | $128 \times 8 \times 8$  |
| Conv4 + BN4 + ReLU                 | $256 \times 4 \times 4$  |
| Flatten                            | 4096                     |
| Linear                             | 1024                     |
| Reshape (produce $\mathcal{Z}_t$ ) | $32 \times 32$           |

Table 3: Structure of the image decoder. DeConv denotes a transpose CNN layer [36], characterized by kernel = 4, stride = 2, and padding = 1.

| Submodule                      | Output tensor shape      |
|--------------------------------|--------------------------|
| Random sample ( $z_t$ )        | $32 \times 32$           |
| Flatten                        | 1024                     |
| Linear + BN0 + ReLU            | 4096                     |
| Reshape                        | $256 \times 4 \times 4$  |
| DeConv1 + BN1 + ReLU           | $128 \times 8 \times 8$  |
| DeConv2 + BN2 + ReLU           | $64 \times 16 \times 16$ |
| DeConv3 + BN3 + ReLU           | $32 \times 32 \times 32$ |
| DeConv4 (produce $\hat{o}_t$ ) | $3 \times 64 \times 64$  |

Table 4: Action mixer  $e_t = m_\phi(z_t, a_t)$ . Concatenate denotes combining the last dimension of two tensors and merging them into one new tensor. The variable  $A$  represents the action dimension, which ranges from 3 to 18 across different games.  $D$  denotes the feature dimension of the Transformer. LN is an abbreviation for layer normalization [37].

| Submodule                                 | Output tensor shape |
|-------------------------------------------|---------------------|
| Random sample ( $z_t$ ), Action ( $a_t$ ) | $32 \times 32, A$   |
| Reshape and concatenate                   | $1024 + A$          |
| Linear1 + LN1 + ReLU                      | $D$                 |
| Linear2 + LN2 (output $e_t$ )             | $D$                 |

Table 5: Positional encoding module.  $w_{1:T}$  is a learnable parameter matrix with shape  $T \times D$ , and  $T$  refers to the sequence length.

| Submodule                   | Output tensor shape |
|-----------------------------|---------------------|
| Input ( $e_{1:T}$ )         |                     |
| Add ( $e_{1:T} + w_{1:T}$ ) | $T \times D$        |
| LN                          |                     |

Table 6: Transformer block. Dropout mechanism [38] can prevent overfitting.

| Submodule                        | Module alias | Output tensor shape |
|----------------------------------|--------------|---------------------|
| Input features (label as $x_1$ ) |              | $T \times D$        |
| Multi-head self attention        |              |                     |
| Linear1 + Dropout( $p$ )         | MHSA         | $T \times D$        |
| Residual (add $x_1$ )            |              |                     |
| LN1 (label as $x_2$ )            |              |                     |
| Linear2 + ReLU                   | FFN          | $T \times 2D$       |
| Linear3 + Dropout( $p$ )         |              | $T \times D$        |
| Residual (add $x_2$ )            |              | $T \times D$        |
| LN2                              |              | $T \times D$        |

Table 7: Transformer based sequence model  $h_{1:T} = f_\phi(e_{1:T})$ . Positional encoding is explained in Table 5 and Transformer block is explained in Table 6.

| Submodule                     | Output tensor shape |
|-------------------------------|---------------------|
| Input ( $e_{1:T}$ )           |                     |
| Positional encoding           |                     |
| Transformer blocks $\times K$ | $T \times D$        |
| Output ( $h_{1:T}$ )          |                     |

Table 8: Pure MLP structures. A 1-layer MLP corresponds to a fully-connected layer. 255 is the size of the bucket of symlog two-hot loss [8].

| Module name            | Symbol                | MLP layers | Input/ MLP hidden/ Output dimension |
|------------------------|-----------------------|------------|-------------------------------------|
| Dynamics head          | $g_\phi^D$            | 1          | D/ -/ 1024                          |
| Reward predictor       | $g_\phi^R$            | 3          | D/ D/ 255                           |
| Continuation predictor | $g_\phi^C$            | 3          | D/ D/ 1                             |
| Policy network         | $\pi_\theta(a_t s_t)$ | 3          | D/ D/ A                             |
| Critic network         | $V_\psi(s_t)$         | 3          | D/ D/ 255                           |

Table 9: Hyperparameters. Note that the environment will provide a ‘done’ signal when losing a life, but will continue running until the actual reset occurs. This configuration aligns with the setup used in IRIS [12].

| Hyperparameter                    | Symbol    | Value                      |
|-----------------------------------|-----------|----------------------------|
| Transformer layers                | $K$       | 2                          |
| Transformer feature dimension     | $D$       | 512                        |
| Transformer heads                 | -         | 8                          |
| Dropout probability               | $p$       | 0.1                        |
| World model training batch size   | $B$       | 16                         |
| World model training batch length | $T$       | 64                         |
| Imagination batch size            | $B$       | 1024                       |
| Imagination context length        | $C$       | 8                          |
| Imagination horizon               | $L$       | 16                         |
| Update world model every env step | -         | 1                          |
| Update agent every env step       | -         | 1                          |
| Environment context length        | -         | 16                         |
| Gamma                             | $\gamma$  | 0.985                      |
| Lambda                            | $\lambda$ | 0.95                       |
| Entropy coefficient               | $\eta$    | $3 \times 10^{-4}$         |
| Critic EMA decay                  | $\sigma$  | 0.98                       |
| Optimizer                         | -         | Adam [39]                  |
| World model learning rate         | -         | $1.0 \times 10^{-4}$       |
| World model gradient clipping     | -         | 1000                       |
| Actor-critic learning rate        | -         | $3.0 \times 10^{-5}$       |
| Actor-critic gradient clipping    | -         | 100                        |
| Gray scale input                  | -         | False                      |
| Frame stacking                    | -         | False                      |
| Frame skipping                    | -         | 4 (max over last 2 frames) |
| Use of life information           | -         | True                       |

441 **D Demonstration trajectory information**

Table 10: To account for frame skipping, the frame count is multiplied by 4. These trajectories were gathered using pre-trained DQN agents [40].

| Game      | Episode return | Frames          |
|-----------|----------------|-----------------|
| Ms Pacman | 5860           | $1612 \times 4$ |
| Pong      | 18             | $2079 \times 4$ |
| Freeway   | 27             | $2048 \times 4$ |

442 **E Computational cost details and comparison**

Table 11: Computational comparison. In the V100 column, an item marked with a star indicates extrapolation based on other graphics cards, while items without a star are tested using actual devices. The extrapolation method employed aligns with the setup used in DreamerV3 [8], where it assumes the P100 is twice as slow and the A100 is twice as fast.

| Method        | Original computing resource         | V100 hours |
|---------------|-------------------------------------|------------|
| SimPLe [10]   | NVIDIA P100, 20 days                | 240*       |
| TWM [11]      | NVIDIA A100, 10 hours               | 20*        |
|               | NVIDIA GeForce RTX 3090, 12.5 hours |            |
| IRIS [12]     | NVIDIA A100, 7 days for two runs    | 168*       |
| DreamerV3 [8] | NVIDIA V100, 12 hours               | 12         |
| STORM         | NVIDIA GeForce RTX 3090, 4.3 hours  | 9.3        |

443 **F Atari video predictions**

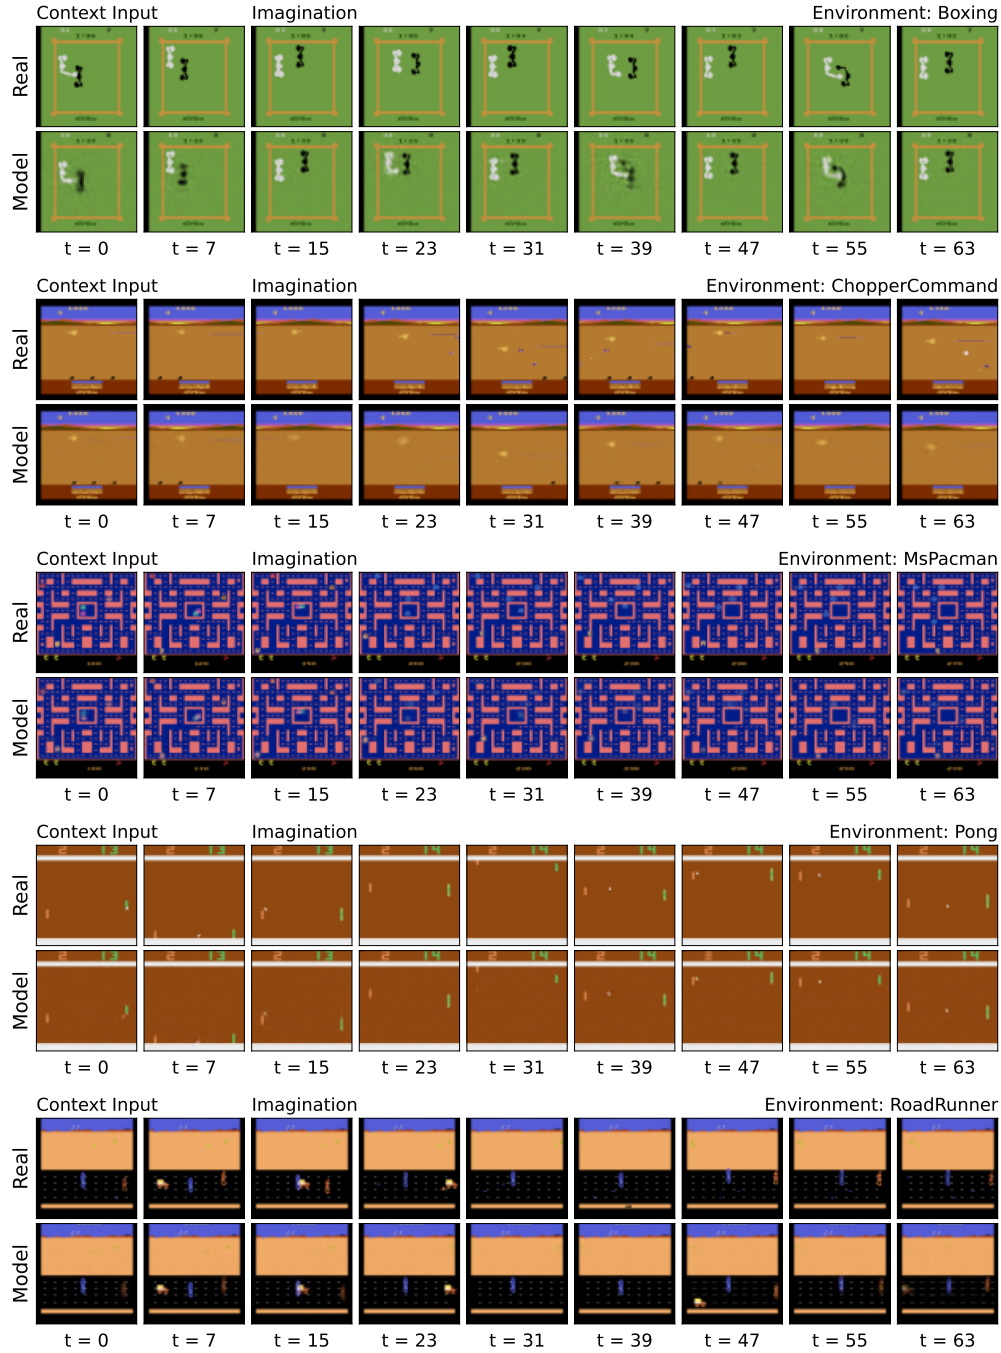

Figure 7: Multi-step predictions on several environments in Atari games. The world model utilizes 8 observations and actions as contextual input, enabling the imagination of future events spanning 56 frames in an auto-regressive manner.
